# Supplementary figures and images for: Phloretin ameliorates diabetic nephropathy by inhibiting nephrin and podocin reduction through a non-hypoglycemic effect
Source: Royal Society of Chemistry journal article supplement (doi:10.1039/d2fo00570k), 2022-01-01

## Supplementary information

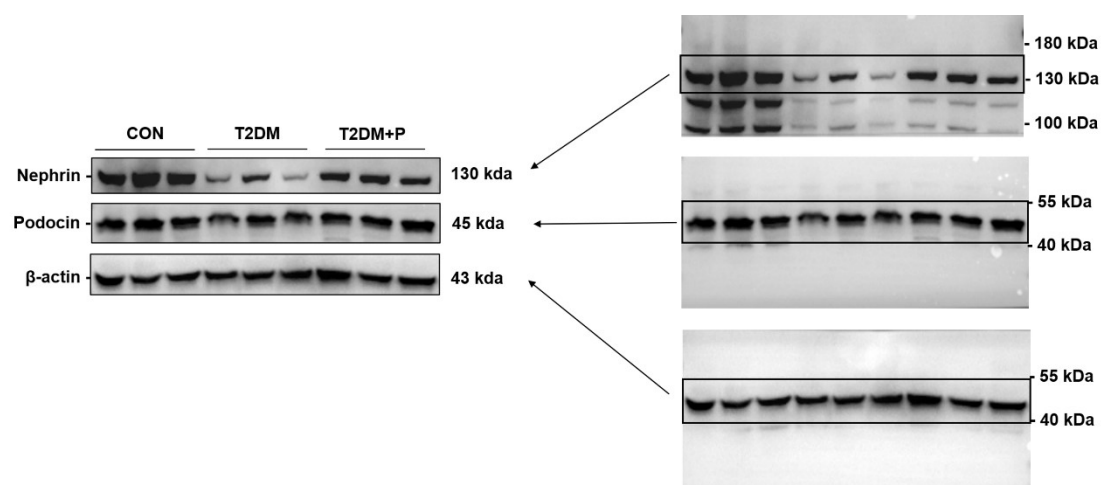

Supplement: d2fo00570k1.pdf [file d2fo00570k1.pdf]
